# Supplementary material for: Role of plasma fatty acid in age-related macular degeneration: insights from a mendelian randomization analysis
Source: Lipids Health Dis. 2024 Jun 29;23:206. doi: 10.1186/s12944-024-02197-8 (PMC11218068; doi:10.1186/s12944-024-02197-8)
Supplement: Supplementary file 3 — Supplementary Material 3 [file 12944_2024_2197_MOESM3_ESM.xlsx]

## Sheet: Table legend
Table S1	Description of GWAS statistic for fatty acid and AMD traits in our study
Table S2	Summary of genetic variants used to estimate the effects of Omega-3 on wAMD in MR analysis
Table S3	Summary of genetic variants used to estimate the effects of Omega-6 on wAMD in MR analysis
Table S4	Summary of genetic variants used to estimate the effects of Omega-6 to Omega-3 ratio on wAMD in MR analysis
Table S5	Summary of genetic variants used to estimate the effects of LA on wAMD in MR analysis
Table S6	Summary of genetic variants used to estimate the effects of DHA on wAMD in MR analysis
Table S7	Summary of genetic variants used to estimate the effects of SFA on wAMD in MR analysis
Table S8	Summary of genetic variants used to estimate the effects of NUFA on wAMD in MR analysis
Table S9	Summary of genetic variants used to estimate the effects of PUFA on wAMD in MR analysis
Table S10	Summary of genetic variants used to estimate the effects of Omega-3 on dry AMD in MR analysis
Table S11	Summary of genetic variants used to estimate the effects of Omega-6 on dry AMD in MR analysis
Table S12	Summary of genetic variants used to estimate the effects of Omega-6 to Omega-3 ratio on dry AMD in MR analysis
Table S13	Summary of genetic variants used to estimate the effects of LA on dry AMD in MR analysis
Table S14	Summary of genetic variants used to estimate the effects of DHA on dry AMD in MR analysis
Table S15	Summary of genetic variants used to estimate the effects of SFA on dry AMD in MR analysis
Table S16	Summary of genetic variants used to estimate the effects of NUFA on dry AMD in MR analysis
Table S17	Summary of genetic variants used to estimate the effects of PUFA on dry AMD in MR analysis
Table S18	Heterogenity and pleiotropy analyses for associations between each fatty acid and AMD

## Sheet: Table S1
Table S1. Description of GWAS statistic for fatty acid and AMD traits in our study
Trait	GWAS ID	Year	Sample size	ncase	ncontrol	Number of SNPs
Omega-3 fatty acid levels	ebi-a-GCST90092931	2022	115006			11590399
Omega-6 fatty acid levels	ebi-a-GCST90092933	2022	115006			11590399
Ratio of omega-6 fatty acids to omega-3 fatty acids	ebi-a-GCST90092934	2022	115006			11590399
Linoleic acid levels	ebi-a-GCST90092880	2022	115006			11590399
Docosahexaenoic acid levels	ebi-a-GCST90092816	2022	115006			11590399
Saturated fatty acid levels	ebi-a-GCST90092980	2022	115006			11590399
Monounsaturated fatty acid levels	ebi-a-GCST90092928	2022	115006			11590399
Polyunsaturated fatty acid levels	ebi-a-GCST90092939	2022	115006			11590399
Dry age-related macular degeneration	finn-b-DRY_AMD	2021		2469	206221	16380423
Wet age-related macular degeneration	finn-b-WET_AMD	2021		2114	206601	16380422
Note: GWAS ID of traits are from the MER IEU OpenGWAS database (https://gwas.mrcieu.ac.uk/)

## Sheet: Table S2
SNP	effect_allele.exposure	other_allele.exposure	effect_allele.outcome	other_allele.outcome	beta.exposure	beta.outcome	eaf.exposure	eaf.outcome	chr	pos	se.outcome	pval.outcome	se.exposure	pval.exposure	samplesize.exposure	R2	F
rs10096633	T	C	T	C	-0.0418412	-0.0295	0.123902	0.09716	8	19830921	0.0548	0.590101	0.00599603	2.99985e-12	115006	0.000380075	43.7268
rs10455872	G	A	G	A	-0.0617415	-0.0766	0.078987	0.04569	6	161010118	0.0778	0.3253	0.00733401	3.80014e-17	115006	0.000554633	63.8204
rs11242109	T	G	T	G	0.0234291	0.0018	0.479035	0.3447	5	131677047	0.0342	0.9569	0.00395796	3.2e-09	115006	0.000273979	31.5173
rs112875651	A	G	A	G	-0.0874051	-0.0013	0.392337	0.3873	8	126506694	0.0334	0.9699	0.00410836	1.9002e-100	115006	0.00364272	420.459
rs11681659	T	C	T	C	-0.0264162	-0.0171	0.716465	0.6235	2	136820960	0.0338	0.6131	0.00436662	1.5e-09	115006	0.000283513	32.6143
rs117143374	C	T	C	T	-0.03454	0.0273	0.14225	0.1052	21	40555561	0.0528	0.6055	0.00569242	1.29999e-09	115006	0.00029113	33.4909
rs117733303	G	A	G	A	-0.110595	-0.058	0.018512	0.01133	6	160922870	0.1533	0.705399	0.0146728	4.79954e-14	115006	0.000444467	51.1382
rs12037485	T	C	T	C	0.0222781	-0.0065	0.460471	0.5294	1	2332391	0.0327	0.8423	0.00396786	2e-08	115006	0.000246606	28.3677
rs12226389	C	T	C	T	-0.0535751	-0.0374	0.185805	0.1774	11	61823630	0.043	0.3844	0.00510749	9.70063e-26	115006	0.000868444	99.9613
rs1260326	C	T	C	T	-0.0830756	0.0672	0.604008	0.6491	2	27730940	0.0343	0.0500899	0.00404264	7.70016e-94	115006	0.00330146	380.939
rs12957708	G	A	G	A	0.0311923	0.0252	0.14228	0.1767	18	47284353	0.0427	0.5547	0.00568503	4.09996e-08	115006	0.000237473	27.3168
rs139974673	C	T	C	T	0.118563	-0.3031	0.025916	0.005223	15	44027885	0.2234	0.1749	0.0124678	1.9002e-21	115006	0.000709729	81.6797
rs141469619	G	A	G	A	0.117162	-0.0157	0.010139	0.004075	11	116714293	0.2702	0.9535	0.0208113	1.79999e-08	115006	0.000275533	31.6961
rs143355652	T	C	T	C	-0.153201	-0.262	0.010466	0.008225	11	61453822	0.1841	0.1547	0.0198593	1.20005e-14	115006	0.000486144	55.9357
rs145659493	A	C	A	C	0.107728	-0.132	0.015853	0.02532	11	61850279	0.1061	0.2137	0.0158266	1e-11	115006	0.000362125	41.6609
rs145786300	A	G	A	G	-0.150855	0.3468	0.011993	0.01011	11	61406089	0.1696	0.0408602	0.0187118	7.50067e-16	115006	0.000539309	62.0561
rs149820547	G	T	G	T	-0.0678421	0.064	0.042105	0.05118	11	61983775	0.0737	0.385	0.00988147	6.59933e-12	115006	0.000371262	42.7124
rs16940904	T	C	T	C	-0.0345078	0.0496	0.226566	0.08301	17	44186063	0.0592	0.4023	0.00474779	3.59998e-13	115006	0.000417333	48.015
rs174564	G	A	G	A	-0.336931	0.0252	0.347009	0.4146	11	61588305	0.033	0.4445	0.00412782	1e-200	115006	0.051447	6237.51
rs1800978	G	C	G	C	-0.0387593	-0.0557	0.123988	0.1052	9	107665978	0.0537	0.2997	0.00603019	1.29999e-10	115006	0.000326341	37.5428
rs182611493	G	A	G	A	-0.220029	0.0695	0.012519	0.0509	19	19458388	0.0766	0.3642	0.0190586	7.8001e-31	115006	0.00119698	137.823
rs2187375	G	A	G	A	0.0524746	-0.0272	0.822879	0.8299	18	47172283	0.0433	0.5309	0.00518371	4.40048e-24	115006	0.000802665	92.3838
rs2232143	C	T	C	T	0.104052	-0.3067	0.021879	0.01316	11	60899701	0.1456	0.0351998	0.0141105	1.69981e-13	115006	0.000463395	53.3169
rs2247056	C	T	C	T	0.0356403	-0.024	0.703307	0.7635	6	31265490	0.0412	0.5602	0.00432842	1.80011e-16	115006	0.000530109	60.997
rs261290	C	T	C	T	-0.112905	0.132	0.654648	0.6181	15	58678720	0.0335	7.99392e-05	0.00416818	1.39959e-161	115006	0.00576403	666.729
rs3039101	TGTA	T	TGTA	T	-0.0352443	-0.0504	0.153601	0.1399	10	5246177	0.0471	0.2842	0.00550396	1.5e-10	115006	0.000322981	37.1561
rs312939	A	G	A	G	0.034251	-0.0164	0.752467	0.7398	2	21409548	0.0373	0.6601	0.00458283	7.8001e-14	115006	0.000437016	50.2805
rs34663616	A	C	A	C	0.035253	-0.0454	0.137651	0.1435	15	58569330	0.0465	0.3287	0.00586293	1.79999e-09	115006	0.000295043	33.9411
rs4000713	A	G	A	G	-0.028225	0.0237	0.295416	0.3191	7	25990597	0.035	0.4977	0.0043421	8.00018e-11	115006	0.000331638	38.1524
rs4860987	T	A	T	A	0.0450329	0.006	0.258612	0.2628	4	69491284	0.0375	0.8722	0.00478075	4.49987e-21	115006	0.00077765	89.5024
rs55891451	C	A	C	A	0.033166	0.0292	0.20172	0.1893	10	96728169	0.0416	0.4826	0.00494622	1.99986e-11	115006	0.000354259	40.7556
rs583609	C	T	C	T	-0.0711993	0.0203	0.352508	0.2642	1	62916796	0.0369	0.5824	0.00414084	2.90001e-66	115006	0.00231411	266.75
rs58542926	T	C	T	C	-0.172929	0.0976	0.074379	0.06416	19	19379549	0.0671	0.1458	0.00754654	3.3037e-116	115006	0.00411765	475.504
rs6129624	A	G	A	G	-0.0242913	0.0864	0.335232	0.2867	20	39167592	0.0359	0.01601	0.0042636	1.2e-08	115006	0.000262995	30.2534
rs62466318	T	C	T	C	-0.0716979	0.0015	0.204201	0.1922	7	73042085	0.0412	0.9701	0.00492892	6.20012e-48	115006	0.00167072	192.461
rs633695	G	A	G	A	0.0848151	-0.126	0.292334	0.3053	15	58725839	0.0355	0.000382296	0.00436378	3.80014e-84	115006	0.00297635	343.314
rs6547409	T	C	T	C	-0.0565011	-0.0547	0.051259	0.07698	2	21190209	0.061	0.3702	0.0090697	4.70002e-10	115006	0.0003105	35.7198
rs660240	C	T	C	T	0.0370395	-0.05	0.784707	0.7865	1	109817838	0.0397	0.2078	0.00481655	1.50003e-14	115006	0.000463551	53.335
rs6602911	T	C	T	C	0.0231802	0.0183	0.360074	0.3623	13	114547372	0.0342	0.5921	0.00412043	1.79999e-08	115006	0.00024762	28.4844
rs673335	C	T	C	T	-0.0684035	0.0931	0.159752	0.2414	11	75450576	0.0381	0.0145001	0.00539262	7.19946e-37	115006	0.00125615	144.644
rs6882345	A	G	A	G	0.0274277	-0.032	0.63285	0.6671	5	156397673	0.0347	0.356	0.00409997	2.19989e-11	115006	0.000349585	40.2178
rs72789541	A	T	A	T	-0.0834033	-0.0359	0.295973	0.3178	16	15127534	0.0351	0.3052	0.00434225	3.19963e-82	115006	0.00289893	334.358
rs737338	T	C	T	C	-0.0674466	0.0305	0.035184	0.06346	19	11347657	0.0672	0.6505	0.0107428	3.40001e-10	115006	0.000308844	35.5293
rs77960347	G	A	G	A	0.157178	-0.2578	0.013234	0.007278	18	47109955	0.1832	0.1593	0.0172904	9.8992e-20	115006	0.000645236	74.2527
rs78689694	C	G	C	G	0.0326453	-0.0017	0.133362	0.1421	11	126234820	0.047	0.9713	0.00581875	2e-08	115006	0.000246344	28.3375
rs7924036	T	G	T	G	0.0222276	0.0083	0.504218	0.5138	10	65191645	0.0325	0.7986	0.0039569	1.89998e-08	115006	0.000247016	28.4148
rs7970695	A	G	A	G	-0.0235143	-0.0374	0.620564	0.584	12	121423376	0.0332	0.2601	0.0040847	8.60003e-09	115006	0.000260387	29.9533
rs964184	C	G	C	G	-0.117565	-0.0034	0.867233	0.8543	11	116648917	0.046	0.9413	0.005805	3.40017e-91	115006	0.00318282	367.206
rs9987289	G	A	G	A	0.0544031	0.0364	0.909161	0.8571	8	9183358	0.0494	0.4615	0.00688493	2.70023e-15	115006	0.000488867	56.2491

## Sheet: Table S3
SNP	effect_allele.exposure	other_allele.exposure	effect_allele.outcome	other_allele.outcome	beta.exposure	beta.outcome	eaf.exposure	eaf.outcome	chr	pos	se.outcome	pval.outcome	se.exposure	pval.exposure	samplesize.exposure	R2	F
rs1002687	A	G	A	G	0.0917563	-0.0153	0.644739	0.7144	1	62963737	0.036	0.670601	0.0042098	2.50035e-105	115006	0.00385685	445.271
rs1081105	C	A	C	A	0.118624	-0.3852	0.027622	0.02125	19	45412955	0.1198	0.00129999	0.0123232	6.20012e-22	115006	0.000755902	86.9975
rs111278137	A	G	A	G	-0.0787637	0.3456	0.021615	0.01047	19	45215081	0.162	0.03287	0.0143417	4e-08	115006	0.00026239	30.1838
rs112875651	A	G	A	G	-0.0635591	-0.0013	0.392337	0.3873	8	126506694	0.0334	0.9699	0.00418539	4.40048e-52	115006	0.00192623	221.951
rs115478735	T	A	T	A	0.0424072	0.0593	0.183303	0.1977	9	136149711	0.0408	0.1465	0.00521297	4.10015e-16	115006	0.000538443	61.9565
rs117488242	G	A	G	A	-0.0355756	-0.0495	0.131672	0.1409	10	5261832	0.0469	0.2918	0.00624596	1.2e-08	115006	0.000289409	33.2928
rs11755689	G	A	G	A	0.0416405	-0.0906	0.334092	0.3888	6	32586376	0.0386	0.01882	0.00440473	3.29989e-21	115006	0.000771511	88.7954
rs11789603	T	C	T	C	0.0483698	0.0191	0.108847	0.07545	9	107647019	0.0617	0.756401	0.00648531	8.80035e-14	115006	0.000453887	52.2225
rs1260326	C	T	C	T	-0.064724	0.0672	0.604008	0.6491	2	27730940	0.0343	0.0500899	0.00411907	1.20005e-55	115006	0.00200396	230.927
rs13108218	G	A	G	A	-0.035128	0.0248	0.615408	0.6771	4	3443931	0.035	0.4781	0.00417284	3.80014e-17	115006	0.000584118	67.2151
rs142158911	A	G	A	G	-0.0937617	-0.1007	0.116703	0.1025	19	11190534	0.0542	0.0631495	0.00631307	6.79986e-50	115006	0.00181247	208.819
rs1800961	T	C	T	C	-0.0748822	-0.0152	0.030194	0.04551	20	43042364	0.0782	0.846	0.0117724	2e-10	115006	0.000328392	37.7788
rs1883711	C	G	C	G	0.0905557	0.0493	0.031197	0.06322	20	39179822	0.0673	0.4641	0.0118431	2.09991e-14	115006	0.00049569	57.0346
rs2126259	C	T	C	T	0.0829891	0.0315	0.899179	0.844	8	9185146	0.0479	0.5108	0.00669742	2.90001e-35	115006	0.00124873	143.789
rs2378390	A	G	A	G	-0.0332858	-0.0113	0.140867	0.09094	20	34154937	0.0562	0.84	0.0058156	1e-08	115006	0.000268175	30.8494
rs2721961	G	T	G	T	-0.0274809	-0.0378	0.280836	0.3091	8	116657911	0.0353	0.2848	0.00449395	9.69996e-10	115006	0.000305051	35.0928
rs2740488	C	A	C	A	-0.0496352	-0.0627	0.265318	0.1968	9	107661742	0.0412	0.1282	0.00457594	2.09991e-27	115006	0.000960452	110.562
rs28377109	A	C	A	C	0.0450439	0.0019	0.116077	0.126	6	32434716	0.09	0.983	0.00629445	8.30042e-13	115006	0.000416354	47.9023
rs34232196	T	C	T	C	-0.0327764	0.0626	0.245336	0.2332	1	55489542	0.0386	0.105	0.00471815	3.69999e-12	115006	0.000397802	45.7671
rs35350651	AC	A	AC	A	0.0277979	0	0.502598	0.5688	12	111907431	0.0328	0.9999	0.00403844	5.79963e-12	115006	0.000386351	44.4491
rs3756772	T	C	T	C	0.0232823	0.0901	0.400766	0.426	6	116325142	0.0329	0.00614101	0.00410898	1.5e-08	115006	0.000260357	29.9499
rs3770586	T	C	T	C	-0.0229768	0.0039	0.48398	0.4147	2	169828995	0.033	0.9055	0.00404862	1.40001e-08	115006	0.000263696	30.3341
rs3817335	A	T	A	T	-0.027965	0.002	0.35055	0.3569	11	47643891	0.0351	0.9552	0.00421165	3.10027e-11	115006	0.000356086	40.9659
rs4008004	A	C	A	C	0.0334374	0.093	0.221833	0.2711	9	15306292	0.0367	0.01136	0.00487192	6.70039e-12	115006	0.000386006	44.4094
rs4299376	T	G	T	G	-0.0356946	0.0433	0.676282	0.7831	2	44072576	0.0396	0.2744	0.00431655	1.29987e-16	115006	0.000557866	64.1926
rs4704210	C	G	C	G	0.0463297	-0.014	0.374206	0.4399	5	74635225	0.0327	0.6692	0.00416513	9.70063e-29	115006	0.00100529	115.729
rs4860948	A	T	A	T	0.0285942	-0.0335	0.244351	0.2378	4	69340991	0.0382	0.3803	0.00470392	1.2e-09	115006	0.00030194	34.7348
rs496654	C	A	C	A	0.0302882	-0.0566	0.517238	0.5595	1	234851165	0.0329	0.0851001	0.00403175	5.79963e-14	115006	0.000458142	52.7124
rs534417	G	A	G	A	0.0391707	0.073	0.875008	0.8861	1	23784965	0.0512	0.1543	0.00607383	1.09999e-10	115006	0.000335619	38.6105
rs55747707	A	G	A	G	-0.0498035	-0.0095	0.203638	0.1799	7	73037366	0.0422	0.8213	0.00501986	3.40017e-23	115006	0.000804487	92.5937
rs56322906	A	G	A	G	-0.101934	0.0226	0.035155	0.06338	19	11346155	0.0673	0.736999	0.0109515	1.29987e-20	115006	0.000704876	81.1208
rs56325564	A	G	A	G	0.0227535	0.0003	0.482656	0.4589	17	45766771	0.0327	0.9923	0.00406151	2.1e-08	115006	0.000258549	29.7419
rs5754102	A	C	A	C	-0.0326814	-0.0627	0.183238	0.3181	22	21927231	0.0352	0.0749998	0.00527073	5.60003e-10	115006	0.0003197	36.7785
rs58542926	T	C	T	C	-0.1284	0.0976	0.074379	0.06416	19	19379549	0.0671	0.1458	0.00768267	1.10002e-62	115006	0.00227009	261.664
rs602633	G	T	G	T	0.0573983	-0.0457	0.782937	0.783	1	109821511	0.0395	0.2471	0.00487783	5.79963e-32	115006	0.0011198	128.926
rs633695	G	A	G	A	0.0730669	-0.126	0.292334	0.3053	15	58725839	0.0355	0.000382296	0.00444717	1.20005e-60	115006	0.00220892	254.596
rs6471717	A	G	A	G	-0.0295948	0.0233	0.663076	0.6149	8	59377357	0.0334	0.4862	0.00427438	4.40048e-12	115006	0.000391342	45.0235
rs6547409	T	C	T	C	-0.0808582	-0.0547	0.051259	0.07698	2	21190209	0.061	0.3702	0.00924119	2.09991e-18	115006	0.00063591	73.1788
rs6602911	T	C	T	C	0.0262676	0.0183	0.360074	0.3623	13	114547372	0.0342	0.5921	0.00419748	3.89996e-10	115006	0.000317975	36.58
rs672889	G	T	G	T	0.0758525	-0.0423	0.860074	0.8536	2	21319016	0.0461	0.3591	0.00580072	4.49987e-39	115006	0.00138485	159.485
rs6882345	A	G	A	G	0.0441725	-0.032	0.63285	0.6671	5	156397673	0.0347	0.356	0.00417626	3.80014e-26	115006	0.000906731	104.372
rs6938647	C	A	C	A	-0.0478033	-0.0245	0.782332	0.8098	6	160986915	0.0418	0.5581	0.00494492	4.19952e-22	115006	0.000778272	89.5741
rs7139079	A	G	A	G	-0.0292329	-0.0498	0.592509	0.5507	12	121415293	0.0328	0.1291	0.00411236	1.20005e-12	115006	0.000412655	47.4765
rs72997616	A	C	A	C	-0.0527256	0.1294	0.094062	0.1052	11	75474195	0.0529	0.0144501	0.00693794	2.99985e-14	115006	0.00047379	54.5136
rs740516	G	C	G	C	-0.0313763	-0.0135	0.151132	0.1997	17	67082962	0.0409	0.7402	0.00565493	2.90001e-08	115006	0.000252598	29.0571
rs74747585	C	T	C	T	-0.0737645	0.2849	0.025172	0.005487	19	45039971	0.2261	0.2076	0.0132168	2.39999e-08	115006	0.000267036	30.7185
rs76116020	G	A	G	A	-0.0570097	0.1164	0.043763	0.04514	16	69385641	0.0781	0.1361	0.00986958	7.59994e-09	115006	0.00027202	31.2918
rs7707394	A	G	A	G	0.0294421	0.0433	0.357102	0.3731	5	74472939	0.0335	0.196	0.00419959	2.39994e-12	115006	0.000398017	45.7918
rs7750288	G	A	G	A	0.025103	0.09	0.285016	0.2779	6	160400147	0.0366	0.01385	0.00445908	1.79999e-08	115006	0.000256831	29.5441
rs77960347	G	A	G	A	0.272485	-0.2578	0.013234	0.007278	18	47109955	0.1832	0.1593	0.0176065	5.00035e-54	115006	0.00193919	223.448
rs79429216	A	G	A	G	0.151678	-0.4227	0.012712	0.004034	19	45445517	0.2531	0.0948309	0.0179494	2.90001e-17	115006	0.000577475	66.4503
rs870526	T	C	T	C	-0.0320783	0.0208	0.521425	0.6099	2	20369562	0.0334	0.533	0.00403664	1.9002e-15	115006	0.000513564	59.0923
rs9266229	G	C	G	C	0.027057	0.0038	0.433975	0.4086	6	31325323	0.0362	0.9155	0.00413903	6.29941e-11	115006	0.000359658	41.377
rs9295128	T	G	T	G	-0.19728	-0.0635	0.016832	0.0115	6	160751531	0.1534	0.6791	0.0159431	3.59998e-35	115006	0.00128813	148.331
rs9304381	T	C	T	C	0.0700213	-0.0192	0.818428	0.8233	18	47158234	0.0428	0.6541	0.0052323	7.70016e-41	115006	0.0014572	167.829
rs9616847	T	A	T	A	0.0235066	0.0428	0.388308	0.416	22	50868669	0.033	0.195	0.00415553	1.5e-08	115006	0.000262494	30.1957
rs964184	C	G	C	G	-0.138873	-0.0034	0.867233	0.8543	11	116648917	0.046	0.9413	0.00594037	7.19449e-121	115006	0.00444111	513.024

## Sheet: Table S4
SNP	effect_allele.exposure	other_allele.exposure	effect_allele.outcome	other_allele.outcome	beta.exposure	beta.outcome	eaf.exposure	eaf.outcome	chr	pos	se.outcome	pval.outcome	se.exposure	pval.exposure	samplesize.exposure	R2	F
rs10075801	G	A	G	A	-0.02358	-0.0093	0.485487	0.3414	5	131708877	0.0343	0.7857	0.00401401	4.20001e-09	115006	0.000277774	31.954
rs112875651	A	G	A	G	0.0719492	-0.0013	0.392337	0.3873	8	126506694	0.0334	0.9699	0.00412529	4.00037e-68	115006	0.00246833	284.571
rs116843064	A	G	A	G	0.0882813	0.0806	0.01986	0.0273	19	8429323	0.1001	0.4206	0.014248	5.80003e-10	115006	0.000303413	34.9043
rs117143374	C	T	C	T	0.0318136	0.0273	0.14225	0.1052	21	40555561	0.0528	0.6055	0.00571328	2.59998e-08	115006	0.000246984	28.4112
rs12226389	C	T	C	T	0.0592832	-0.0374	0.185805	0.1774	11	61823630	0.043	0.3844	0.00512548	6.09958e-31	115006	0.00106336	122.42
rs1260326	C	T	C	T	0.066446	0.0672	0.604008	0.6491	2	27730940	0.0343	0.0500899	0.00405986	3.29989e-60	115006	0.00211201	243.404
rs12976395	C	G	C	G	-0.0272184	-0.019	0.504524	0.5316	19	45441907	0.0332	0.566899	0.0042714	1.89998e-10	115006	0.00037039	42.6122
rs139974673	C	T	C	T	-0.117068	-0.3031	0.025916	0.005223	15	44027885	0.2234	0.1749	0.0125202	8.69961e-21	115006	0.000691944	79.6314
rs145786300	A	G	A	G	0.176634	0.3468	0.011993	0.01011	11	61406089	0.1696	0.0408602	0.0187777	5.10035e-21	115006	0.000739378	85.0943
rs150370599	T	C	T	C	-0.0475725	0.0076	0.080318	0.07283	11	60718792	0.063	0.9046	0.00728355	6.4998e-11	115006	0.000334343	38.4637
rs182611493	G	A	G	A	0.19692	0.0695	0.012519	0.0509	19	19458388	0.0766	0.3642	0.0191342	7.70016e-25	115006	0.000958756	110.367
rs195445	T	C	T	C	0.0344283	0.0085	0.688414	0.6758	11	61744342	0.035	0.8083	0.00427728	8.30042e-16	115006	0.000508497	58.509
rs2394976	T	G	T	G	0.0315075	0.1143	0.161642	0.1125	6	31311912	0.0546	0.0361701	0.00538488	4.90004e-09	115006	0.000269055	30.9508
rs2463523	C	A	C	A	0.0401451	0.0448	0.23479	0.08253	17	43686419	0.0594	0.451	0.00475753	3.19963e-17	115006	0.000579102	66.6377
rs4000713	A	G	A	G	0.0302187	0.0237	0.295416	0.3191	7	25990597	0.035	0.4977	0.00435921	4.10015e-12	115006	0.000380144	43.7347
rs4860987	T	A	T	A	-0.0411323	0.006	0.258612	0.2628	4	69491284	0.0375	0.8722	0.00479927	1e-17	115006	0.000648769	74.6595
rs583609	C	T	C	T	0.0428152	0.0203	0.352508	0.2642	1	62916796	0.0369	0.5824	0.0041587	7.39946e-25	115006	0.000836815	96.3176
rs58542926	T	C	T	C	0.144499	0.0976	0.074379	0.06416	19	19379549	0.0671	0.1458	0.00757644	4.30031e-81	115006	0.00287504	331.594
rs62466318	T	C	T	C	0.0599701	0.0015	0.204201	0.1922	7	73042085	0.0412	0.9701	0.00494834	8.4004e-34	115006	0.00116886	134.58
rs6693447	G	T	G	T	-0.0250996	0.0033	0.461701	0.5397	1	2330190	0.0328	0.9205	0.00398654	3.09999e-10	115006	0.000313147	36.0244
rs673335	C	T	C	T	0.0611093	0.0931	0.159752	0.2414	11	75450576	0.0381	0.0145001	0.00541161	1.39991e-29	115006	0.00100253	115.411
rs72789541	A	T	A	T	0.0906088	-0.0359	0.295973	0.3178	16	15127534	0.0351	0.3052	0.00435849	5.40008e-96	115006	0.00342147	394.833
rs77323894	C	G	C	G	-0.0682803	-0.2239	0.038434	0.02727	11	60896505	0.1032	0.0300802	0.0107365	2e-10	115006	0.0003446	39.6441
rs7819706	G	A	G	A	0.0363774	-0.0384	0.118288	0.09429	8	19844415	0.0556	0.4893	0.00614755	3.29997e-09	115006	0.000276033	31.7536
rs7916868	T	A	T	A	-0.0282856	0.0074	0.504504	0.5136	10	64988931	0.0326	0.8199	0.00397492	1.10002e-12	115006	0.000400005	46.0206
rs8074191	C	T	C	T	0.0281472	-0.053	0.756121	0.7079	17	17407191	0.0358	0.1387	0.00463331	1.2e-09	115006	0.000292191	33.6129
rs9332238	A	G	A	G	-0.0347177	0.0247	0.198299	0.1737	10	96748492	0.043	0.565999	0.00498195	3.19963e-12	115006	0.000383235	44.0904
rs964184	C	G	C	G	0.0746316	-0.0034	0.867233	0.8543	11	116648917	0.046	0.9413	0.00582544	1.39991e-37	115006	0.00128263	147.697
rs9947684	G	A	G	A	-0.0276606	0.0364	0.654466	0.6246	18	47166694	0.0335	0.2775	0.00417279	3.40017e-11	115006	0.000346044	39.8102

## Sheet: Table S5
SNP	effect_allele.exposure	other_allele.exposure	effect_allele.outcome	other_allele.outcome	beta.exposure	beta.outcome	eaf.exposure	eaf.outcome	chr	pos	se.outcome	pval.outcome	se.exposure	pval.exposure	samplesize.exposure	R2	F
rs1002687	A	G	A	G	0.087773	-0.0153	0.644739	0.7144	1	62963737	0.036	0.670601	0.00423269	1.59993e-95	115006	0.00352926	407.316
rs1081105	C	A	C	A	0.119441	-0.3852	0.027622	0.02125	19	45412955	0.1198	0.00129999	0.0123902	5.40008e-22	115006	0.00076635	88.2009
rs11065358	C	T	C	T	-0.0267704	-0.0334	0.661868	0.5883	12	121384495	0.0334	0.3167	0.00430096	4.79999e-10	115006	0.000320773	36.902
rs112875651	A	G	A	G	-0.0508616	-0.0013	0.392337	0.3873	8	126506694	0.0334	0.9699	0.00420808	1.20005e-33	115006	0.00123348	142.03
rs115478735	T	A	T	A	0.0427716	0.0593	0.183303	0.1977	9	136149711	0.0408	0.1465	0.00524064	3.29989e-16	115006	0.000547736	63.0264
rs11755689	G	A	G	A	0.0433006	-0.0906	0.334092	0.3888	6	32586376	0.0386	0.01882	0.00442812	1.39991e-22	115006	0.000834254	96.0226
rs11789603	T	C	T	C	0.0458455	0.0191	0.108847	0.07545	9	107647019	0.0617	0.756401	0.00651973	1.99986e-12	115006	0.000407748	46.9118
rs12916	C	T	C	T	0.0503054	-0.0127	0.400366	0.4539	5	74656539	0.0326	0.6979	0.00413738	5.19996e-34	115006	0.00121507	139.908
rs13108218	G	A	G	A	-0.0324352	0.0248	0.615408	0.6771	4	3443931	0.035	0.4781	0.00419501	1.10002e-14	115006	0.000497997	57.3002
rs141469619	G	A	G	A	0.125634	-0.0157	0.010139	0.004075	11	116714293	0.2702	0.9535	0.021405	4.39997e-09	115006	0.000316821	36.4472
rs142158911	A	G	A	G	-0.0909396	-0.1007	0.116703	0.1025	19	11190534	0.0542	0.0631495	0.00634737	1.50003e-46	115006	0.001705	196.417
rs174564	G	A	G	A	0.0842926	0.0252	0.347009	0.4146	11	61588305	0.033	0.4445	0.00424559	1e-87	115006	0.00322001	371.51
rs186696265	T	C	T	C	-0.227169	-0.0208	0.014357	0.01671	6	161111700	0.1284	0.871	0.0170878	2.49977e-40	115006	0.00146053	168.213
rs1883711	C	G	C	G	0.0878257	0.0493	0.031197	0.06322	20	39179822	0.0673	0.4641	0.0119061	1.59993e-13	115006	0.000466253	53.646
rs2126259	C	T	C	T	0.0701496	0.0315	0.899179	0.844	8	9185146	0.0479	0.5108	0.00673372	2.09991e-25	115006	0.000892231	102.702
rs2389599	C	G	C	G	0.0230778	-0.0506	0.524811	0.5262	2	169912191	0.0326	0.12	0.00408024	1.5e-08	115006	0.000265637	30.5574
rs2740488	C	A	C	A	-0.0479054	-0.0627	0.265318	0.1968	9	107661742	0.0412	0.1282	0.00460023	2.09991e-25	115006	0.000894674	102.983
rs28377109	A	C	A	C	0.0456118	0.0019	0.116077	0.126	6	32434716	0.09	0.983	0.00632788	5.70033e-13	115006	0.000426919	49.1183
rs3011437	G	T	G	T	0.0357025	0.0701	0.294366	0.2397	6	161074143	0.0383	0.0675196	0.00447596	1.50003e-15	115006	0.000529535	60.9309
rs34232196	T	C	T	C	-0.0311267	0.0626	0.245336	0.2332	1	55489542	0.0386	0.105	0.00474381	5.30029e-11	115006	0.000358766	41.2743
rs35350651	AC	A	AC	A	0.0253793	0	0.502598	0.5688	12	111907431	0.0328	0.9999	0.00406	4.09996e-10	115006	0.000322046	37.0485
rs35633876	T	G	T	G	-0.0344114	0.0094	0.481846	0.5652	2	20363074	0.0329	0.774599	0.00407035	2.80027e-17	115006	0.000591292	68.0411
rs3817335	A	T	A	T	-0.0262264	0.002	0.35055	0.3569	11	47643891	0.0351	0.9552	0.00423309	5.80003e-10	115006	0.000313187	36.029
rs4299376	T	G	T	G	-0.0390728	0.0433	0.676282	0.7831	2	44072576	0.0396	0.2744	0.00434009	2.19989e-19	115006	0.000668457	76.9267
rs4665972	C	T	C	T	-0.0513158	0.0759	0.604638	0.6231	2	27598097	0.0337	0.0243501	0.00416824	7.89951e-35	115006	0.00125899	144.971
rs4939883	C	T	C	T	0.0626293	-0.0147	0.819166	0.8249	18	47167214	0.0428	0.731499	0.00525942	1.10002e-32	115006	0.00116208	133.8
rs514230	T	A	T	A	0.0290957	-0.0483	0.517621	0.5668	1	234858597	0.033	0.1439	0.00405422	7.10068e-13	115006	0.000422754	48.639
rs534417	G	A	G	A	0.0359155	0.073	0.875008	0.8861	1	23784965	0.0512	0.1543	0.00610685	4.09996e-09	115006	0.000282155	32.4581
rs55747707	A	G	A	G	-0.0455868	-0.0095	0.203638	0.1799	7	73037366	0.0422	0.8213	0.0050467	1.69981e-19	115006	0.000674027	77.5681
rs56322906	A	G	A	G	-0.0908691	0.0226	0.035155	0.06338	19	11346155	0.0673	0.736999	0.011011	1.50003e-16	115006	0.000560154	64.456
rs58542926	T	C	T	C	-0.110032	0.0976	0.074379	0.06416	19	19379549	0.0671	0.1458	0.00772442	4.79954e-46	115006	0.00166706	192.039
rs602633	G	T	G	T	0.0532623	-0.0457	0.782937	0.783	1	109821511	0.0395	0.2471	0.00490435	1.80011e-27	115006	0.000964234	110.998
rs6471717	A	G	A	G	-0.0314069	0.0233	0.663076	0.6149	8	59377357	0.0334	0.4862	0.00429755	2.70023e-13	115006	0.000440733	50.7084
rs6602911	T	C	T	C	0.0242964	0.0183	0.360074	0.3623	13	114547372	0.0342	0.5921	0.00421981	8.50002e-09	115006	0.000272042	31.2944
rs6882345	A	G	A	G	0.0435446	-0.032	0.63285	0.6671	5	156397673	0.0347	0.356	0.00419878	3.40017e-25	115006	0.000881136	101.424
rs693	A	G	A	G	0.060697	-0.0537	0.520864	0.4216	2	21232195	0.033	0.1038	0.00405419	1.10002e-50	115006	0.00183886	211.865
rs740516	G	C	G	C	-0.0334514	-0.0135	0.151132	0.1997	17	67082962	0.0409	0.7402	0.00568491	4e-09	115006	0.000287115	33.0288
rs7707394	A	G	A	G	0.0315521	0.0433	0.357102	0.3731	5	74472939	0.0335	0.196	0.00422224	7.8001e-14	115006	0.00045711	52.5935
rs7750288	G	A	G	A	0.0267774	0.09	0.285016	0.2779	6	160400147	0.0366	0.01385	0.00448276	2.30001e-09	115006	0.000292235	33.618
rs77960347	G	A	G	A	0.246303	-0.2578	0.013234	0.007278	18	47109955	0.1832	0.1593	0.0177011	5.19996e-44	115006	0.00158444	182.506
rs7816447	C	T	C	T	-0.0489828	-0.0303	0.100847	0.08806	8	19882950	0.0573	0.5972	0.006719	3.10027e-13	115006	0.000435125	50.0629
rs79429216	A	G	A	G	0.147596	-0.4227	0.012712	0.004034	19	45445517	0.2531	0.0948309	0.0180469	2.90001e-16	115006	0.000546811	62.9198
rs865716	T	A	T	A	-0.023931	0.0173	0.499016	0.4366	12	125290856	0.0329	0.5997	0.00408897	4.79999e-09	115006	0.000286345	32.9403
rs9266229	G	C	G	C	0.0260521	0.0038	0.433975	0.4086	6	31325323	0.0362	0.9155	0.00416101	3.79997e-10	115006	0.000333439	38.3596
rs964184	C	G	C	G	-0.145189	-0.0034	0.867233	0.8543	11	116648917	0.046	0.9413	0.00597061	1.30017e-130	115006	0.00485426	560.983

## Sheet: Table S6
SNP	effect_allele.exposure	other_allele.exposure	effect_allele.outcome	other_allele.outcome	beta.exposure	beta.outcome	eaf.exposure	eaf.outcome	chr	pos	se.outcome	pval.outcome	se.exposure	pval.exposure	samplesize.exposure	R2	F
rs11122450	G	T	G	T	0.0221396	0.0307	0.611483	0.5638	1	230301811	0.0329	0.3506	0.00402326	3.69999e-08	115006	0.000232897	26.7903
rs112875651	A	G	A	G	-0.0492908	-0.0013	0.392337	0.3873	8	126506694	0.0334	0.9699	0.00407289	1e-33	115006	0.00115847	133.383
rs11681659	T	C	T	C	-0.0305945	-0.0171	0.716465	0.6235	2	136820960	0.0338	0.6131	0.00432797	1.59993e-12	115006	0.000380293	43.7519
rs12226389	C	T	C	T	-0.0465234	-0.0374	0.185805	0.1774	11	61823630	0.043	0.3844	0.0050687	4.40048e-20	115006	0.000654875	75.3627
rs1260326	C	T	C	T	-0.0478469	0.0672	0.604008	0.6491	2	27730940	0.0343	0.0500899	0.00400686	7.19946e-33	115006	0.00109513	126.083
rs12872990	G	A	G	A	-0.0247993	-0.0647	0.706802	0.7663	13	55958335	0.0381	0.0898008	0.00450626	3.69999e-08	115006	0.000254899	29.3218
rs12914626	T	C	T	C	-0.0607243	0.1134	0.701943	0.6453	15	58738423	0.0343	0.000940892	0.00431309	5.10035e-45	115006	0.00154297	177.721
rs139974673	C	T	C	T	0.0706679	-0.3031	0.025916	0.005223	15	44027885	0.2234	0.1749	0.0123542	1.09999e-08	115006	0.000252138	29.0042
rs143355652	T	C	T	C	-0.151052	-0.262	0.010466	0.008225	11	61453822	0.1841	0.1547	0.0197085	1.80011e-14	115006	0.000472601	54.3767
rs145391587	C	A	C	A	0.036602	-0.0306	0.100262	0.08885	8	19820933	0.0572	0.5928	0.00651709	2e-08	115006	0.000241709	27.8042
rs145786300	A	G	A	G	-0.133405	0.3468	0.011993	0.01011	11	61406089	0.1696	0.0408602	0.0185697	6.79986e-13	115006	0.000421757	48.5242
rs149820547	G	T	G	T	-0.0574582	0.064	0.042105	0.05118	11	61983775	0.0737	0.385	0.00980643	4.70002e-09	115006	0.000266309	30.6347
rs1560390	C	T	C	T	-0.04996	0.0338	0.219675	0.154	15	58580781	0.0449	0.4512	0.00476181	9.3994e-26	115006	0.000855719	98.4954
rs16940904	T	C	T	C	-0.0389871	0.0496	0.226566	0.08301	17	44186063	0.0592	0.4023	0.00470419	1.20005e-16	115006	0.000532709	61.2963
rs1800978	G	C	G	C	-0.0348568	-0.0557	0.123988	0.1052	9	107665978	0.0537	0.2997	0.00597501	5.39995e-09	115006	0.000263934	30.3614
rs182611493	G	A	G	A	-0.166188	0.0695	0.012519	0.0509	19	19458388	0.0766	0.3642	0.0188898	1.39991e-18	115006	0.000682854	78.5846
rs191623731	G	T	G	T	0.092449	-0.1316	0.015839	0.02574	11	61844663	0.1052	0.2112	0.0156932	3.79997e-09	115006	0.000266458	30.6519
rs2232143	C	T	C	T	0.0852519	-0.3067	0.021879	0.01316	11	60899701	0.1456	0.0351998	0.0140033	1.09999e-09	115006	0.00031107	35.7854
rs273912	T	G	T	G	0.0260377	0.0364	0.707084	0.5854	5	131661349	0.0332	0.2727	0.00430356	1.40001e-09	115006	0.000280834	32.3061
rs2807967	C	T	C	T	0.0252475	-0.0436	0.718117	0.7295	10	22252089	0.0368	0.2358	0.0043751	7.90005e-09	115006	0.000258066	29.6863
rs2853968	G	A	G	A	0.0245504	0.0196	0.403232	0.4192	6	31381351	0.0385	0.611399	0.00400283	8.60003e-10	115006	0.000290073	33.3693
rs312939	A	G	A	G	0.0387576	-0.0164	0.752467	0.7398	2	21409548	0.0373	0.6601	0.00454227	1.39991e-17	115006	0.000559583	64.3903
rs4860987	T	A	T	A	0.0382907	0.006	0.258612	0.2628	4	69491284	0.0375	0.8722	0.00473652	6.29941e-16	115006	0.000562226	64.6946
rs4986970	T	A	T	A	-0.0683276	0.0856	0.033929	0.02923	16	67976320	0.097	0.3771	0.0108658	3.2e-10	115006	0.000306057	35.2086
rs525028	A	G	A	G	-0.0300942	-0.0654	0.708546	0.6288	11	116705516	0.0339	0.0535402	0.00432096	3.29989e-12	115006	0.000374053	43.0337
rs55891451	C	A	C	A	0.03156	0.0292	0.20172	0.1893	10	96728169	0.0416	0.4826	0.00490048	1.2e-10	115006	0.000320781	36.9029
rs58542926	T	C	T	C	-0.119759	0.0976	0.074379	0.06416	19	19379549	0.0671	0.1458	0.00747969	1.10002e-57	115006	0.00197483	227.563
rs638714	T	G	T	G	-0.0376253	0.0203	0.345965	0.2642	1	62906489	0.0369	0.5817	0.00413673	9.3994e-20	115006	0.000640653	73.7249
rs660240	C	T	C	T	0.0431485	-0.05	0.784707	0.7865	1	109817838	0.0397	0.2078	0.00477367	1.59993e-19	115006	0.00062907	72.3911
rs673335	C	T	C	T	-0.056988	0.0931	0.159752	0.2414	11	75450576	0.0381	0.0145001	0.00535167	1.80011e-26	115006	0.000871868	100.356
rs72789541	A	T	A	T	-0.07999	-0.0359	0.295973	0.3178	16	15127534	0.0351	0.3052	0.00430253	3.80014e-77	115006	0.00266651	307.479
rs72836561	T	C	T	C	-0.06284	0.0289	0.031481	0.03213	17	41926126	0.0932	0.756	0.0112288	2.19999e-08	115006	0.000240801	27.6998
rs73045691	A	G	A	G	0.0291655	0.0148	0.304275	0.3795	19	45440529	0.0343	0.6664	0.00447328	7.00003e-11	115006	0.000360141	41.4326
rs73109460	A	G	A	G	-0.0352118	0.037	0.123614	0.07381	7	44792326	0.062	0.5507	0.00599671	4.30002e-09	115006	0.000268639	30.9029
rs7570469	T	C	T	C	-0.0231794	0.0599	0.669474	0.6739	2	79709354	0.0348	0.0851805	0.00416009	2.5e-08	115006	0.000237779	27.3521
rs77960347	G	A	G	A	0.139034	-0.2578	0.013234	0.007278	18	47109955	0.1832	0.1593	0.0171306	4.79954e-16	115006	0.000504867	58.0911
rs78689694	C	G	C	G	0.0405572	-0.0017	0.133362	0.1421	11	126234820	0.047	0.9713	0.00577456	2.19989e-12	115006	0.000380221	43.7435
rs7924036	T	G	T	G	0.0346448	0.0083	0.504218	0.5138	10	65191645	0.0325	0.7986	0.00392031	9.79941e-19	115006	0.000600088	69.054
rs9304381	T	C	T	C	0.0496313	-0.0192	0.818428	0.8233	18	47158234	0.0428	0.6541	0.00509088	1.9002e-22	115006	0.0007321	84.2562
rs9987289	G	A	G	A	0.0564948	0.0364	0.909161	0.8571	8	9183358	0.0494	0.4615	0.00682548	1.29987e-16	115006	0.000527181	60.6599

## Sheet: Table S7
SNP	effect_allele.exposure	other_allele.exposure	effect_allele.outcome	other_allele.outcome	beta.exposure	beta.outcome	eaf.exposure	eaf.outcome	chr	pos	se.outcome	pval.outcome	se.exposure	pval.exposure	samplesize.exposure	R2	F
rs1002687	A	G	A	G	0.0824895	-0.0153	0.644739	0.7144	1	62963737	0.036	0.670601	0.00425075	6.90081e-84	115006	0.00311716	359.607
rs102275	C	T	C	T	-0.0330544	0.0273	0.349751	0.4159	11	61557803	0.033	0.4072	0.00425489	7.89951e-15	115006	0.000496967	57.1816
rs10455872	G	A	G	A	-0.135458	-0.0766	0.078987	0.04569	6	161010118	0.0778	0.3253	0.00753874	3.50026e-72	115006	0.00266969	307.847
rs10504255	A	G	A	G	-0.0282853	0.0207	0.662977	0.6229	8	59398461	0.0336	0.5372	0.00431685	5.70033e-11	115006	0.000357528	41.1318
rs10810374	C	A	C	A	0.025975	0.093	0.248608	0.2711	9	15306292	0.0367	0.01136	0.00474004	4.30002e-08	115006	0.000252071	28.9965
rs11076175	G	A	G	A	-0.0388432	-0.131	0.178892	0.1725	16	57006378	0.0434	0.00252098	0.00532819	3.10027e-13	115006	0.000443253	50.9984
rs11429307	GT	G	GT	G	0.0339696	-0.0522	0.191495	0.1352	5	55857025	0.0482	0.2782	0.00518552	5.70033e-11	115006	0.000357315	41.1073
rs117488242	G	A	G	A	-0.0407977	-0.0495	0.131672	0.1409	10	5261832	0.0469	0.2918	0.00630477	9.70063e-11	115006	0.000380609	43.7882
rs117733303	G	A	G	A	-0.237612	-0.058	0.018512	0.01133	6	160922870	0.1533	0.705399	0.0150824	6.4003e-56	115006	0.00205166	236.434
rs11789603	T	C	T	C	0.0430623	0.0191	0.108847	0.07545	9	107647019	0.0617	0.756401	0.00654812	4.79954e-11	115006	0.000359744	41.3869
rs11895352	T	C	T	C	-0.0268626	0.0232	0.475391	0.5812	2	20367135	0.0331	0.4838	0.00408233	4.70002e-11	115006	0.000359926	41.4078
rs12208357	T	C	T	C	0.0507871	0.1763	0.069994	0.05697	6	160543148	0.07	0.0117501	0.00799825	2.19999e-10	115006	0.000335802	38.6316
rs1260326	C	T	C	T	-0.106394	0.0672	0.604008	0.6491	2	27730940	0.0343	0.0500899	0.00415713	1.79887e-144	115006	0.00541494	626.13
rs13108218	G	A	G	A	-0.0277641	0.0248	0.615408	0.6771	4	3443931	0.035	0.4781	0.00421205	4.40048e-11	115006	0.000364889	41.979
rs13389219	T	C	T	C	-0.0299221	0.0157	0.392574	0.3479	2	165528876	0.0342	0.6455	0.00416596	6.79986e-13	115006	0.000427001	49.1278
rs139315015	G	A	G	A	-0.0840885	-0.0266	0.105286	0.08961	8	19893297	0.0569	0.640301	0.00661994	5.70033e-37	115006	0.00133217	153.409
rs139974673	C	T	C	T	0.0958836	-0.3031	0.025916	0.005223	15	44027885	0.2234	0.1749	0.0128252	7.70016e-14	115006	0.000464176	53.4069
rs141469619	G	A	G	A	0.164093	-0.0157	0.010139	0.004075	11	116714293	0.2702	0.9535	0.021499	2.29985e-14	115006	0.00054048	62.1909
rs142158911	A	G	A	G	-0.0598613	-0.1007	0.116703	0.1025	19	11190534	0.0542	0.0631495	0.00637679	6.20012e-21	115006	0.000738773	85.0247
rs1883711	C	G	C	G	0.0794341	0.0493	0.031197	0.06322	20	39179822	0.0673	0.4641	0.0119575	3.10027e-11	115006	0.00038141	43.8804
rs2000999	A	G	A	G	0.0284117	-0.0839	0.188603	0.1942	16	72108093	0.041	0.0408301	0.00519629	4.60002e-08	115006	0.000247062	28.4202
rs2126259	C	T	C	T	0.0572679	0.0315	0.899179	0.844	8	9185146	0.0479	0.5108	0.00675706	2.29985e-17	115006	0.000594634	68.426
rs2156552	T	A	T	A	0.0510402	-0.0098	0.821818	0.8251	18	47181668	0.0429	0.8194	0.00530578	6.59933e-22	115006	0.000762947	87.8089
rs2478236	A	G	A	G	-0.0251196	0.0111	0.403819	0.4081	10	94797973	0.033	0.737801	0.00415363	1.5e-09	115006	0.000303823	34.9515
rs2740488	C	A	C	A	-0.0363629	-0.0627	0.265318	0.1968	9	107661742	0.0412	0.1282	0.00462025	3.50026e-15	115006	0.000515482	59.313
rs28383314	C	T	C	T	0.0385885	0.0189	0.622949	0.6888	6	32587213	0.0385	0.6234	0.00419547	3.69999e-20	115006	0.000699517	80.5036
rs34120986	A	G	A	G	-0.0248578	0.0205	0.371625	0.387	8	11692128	0.0344	0.5506	0.00431627	8.50002e-09	115006	0.000288589	33.1984
rs3846661	G	A	G	A	0.0264602	-0.0076	0.397843	0.4553	5	74639178	0.0327	0.8161	0.0041581	2e-10	115006	0.000335458	38.5919
rs4564803	T	G	T	G	-0.0494208	0.0218	0.22818	0.2779	2	21205502	0.0364	0.5489	0.00483679	1.69981e-24	115006	0.000860287	99.0216
rs4704834	G	A	G	A	0.0372358	-0.0264	0.644043	0.6719	5	156443066	0.0348	0.4473	0.00424432	1.69981e-18	115006	0.000635717	73.1565
rs55747707	A	G	A	G	-0.069736	-0.0095	0.203638	0.1799	7	73037366	0.0422	0.8213	0.00506719	4.30031e-43	115006	0.0015773	181.682
rs60960031	A	G	A	G	-0.0252819	-0.041	0.40287	0.4137	2	21530659	0.0332	0.218	0.00415331	1.09999e-09	115006	0.000307527	35.3777
rs632057	G	T	G	T	-0.0283876	-0.003	0.627772	0.5718	6	139834012	0.0327	0.9263	0.00420727	1.50003e-11	115006	0.000376616	43.3286
rs660240	C	T	C	T	0.0315817	-0.05	0.784707	0.7865	1	109817838	0.0397	0.2078	0.00495298	1.79999e-10	115006	0.000337007	38.7702
rs6602911	T	C	T	C	0.0262742	0.0183	0.360074	0.3623	13	114547372	0.0342	0.5921	0.00423709	5.60003e-10	115006	0.000318134	36.5984
rs6854749	T	A	T	A	0.0320809	-0.0045	0.19799	0.2451	4	87968798	0.0379	0.9064	0.00508773	2.90001e-10	115006	0.000326848	37.6011
rs7118569	G	C	G	C	-0.0456634	0.1719	0.090218	0.08328	11	75526482	0.0589	0.00353102	0.00710267	1.29999e-10	115006	0.000342292	39.3785
rs739320	C	T	C	T	-0.030032	-0.0554	0.606658	0.6733	19	49261368	0.0349	0.1121	0.00426087	1.80011e-12	115006	0.00043044	49.5237
rs7551124	T	C	T	C	0.0382308	0.073	0.875392	0.8861	1	23785760	0.0512	0.1543	0.00614253	4.79999e-10	115006	0.000318864	36.6823
rs76895963	G	T	G	T	-0.0896654	-0.0257	0.020559	0.03123	12	4384844	0.0965	0.7898	0.0158287	1.5e-08	115006	0.000323787	37.2489
rs77960347	G	A	G	A	0.196646	-0.2578	0.013234	0.007278	18	47109955	0.1832	0.1593	0.0177797	1.99986e-28	115006	0.00100996	116.267
rs7973253	G	A	G	A	0.0280507	-0.055	0.367262	0.3267	12	109878115	0.0349	0.1145	0.00422919	3.29989e-11	115006	0.000365694	42.0716
rs7979473	G	A	G	A	-0.0279927	-0.034	0.612985	0.581	12	121420260	0.0332	0.3051	0.00421319	3.10027e-11	115006	0.00037179	42.7732
rs8107974	T	A	T	A	-0.117425	0.0993	0.075532	0.06462	19	19388500	0.0668	0.1372	0.0077144	2.49977e-52	115006	0.00192564	221.883
rs900048	T	C	T	C	0.0263328	0.0357	0.709503	0.7602	3	136218930	0.0381	0.3484	0.00449118	4.49997e-09	115006	0.000285838	32.8819
rs9616847	T	A	T	A	0.0231042	0.0428	0.388308	0.416	22	50868669	0.033	0.195	0.00419491	3.59998e-08	115006	0.000253584	29.1705
rs964184	C	G	C	G	-0.145494	-0.0034	0.867233	0.8543	11	116648917	0.046	0.9413	0.00599682	5.00035e-130	115006	0.00487468	563.354

## Sheet: Table S8
SNP	effect_allele.exposure	other_allele.exposure	effect_allele.outcome	other_allele.outcome	beta.exposure	beta.outcome	eaf.exposure	eaf.outcome	chr	pos	se.outcome	pval.outcome	se.exposure	pval.exposure	samplesize.exposure	R2	F
rs1002687	A	G	A	G	0.0914582	-0.0153	0.644739	0.7144	1	62963737	0.036	0.670601	0.0042485	8.70964e-103	115006	0.00383183	442.371
rs10455872	G	A	G	A	-0.148375	-0.0766	0.078987	0.04569	6	161010118	0.0778	0.3253	0.0075343	2.49977e-86	115006	0.00320312	369.555
rs1047964	T	G	T	G	-0.17498	-0.0995	0.010066	0.009829	11	117156893	0.1678	0.5533	0.0206924	2.80027e-17	115006	0.000610197	70.2179
rs1052248	A	T	A	T	0.0312364	0.0169	0.257969	0.2536	6	31556581	0.0376	0.6528	0.00464902	1.80011e-11	115006	0.000373544	42.9751
rs1128249	T	G	T	G	-0.0355909	0.0134	0.39204	0.3481	2	165528624	0.0342	0.6943	0.00416487	1.29987e-17	115006	0.000603828	69.4846
rs11429307	GT	G	GT	G	0.0431169	-0.0522	0.191495	0.1352	5	55857025	0.0482	0.2782	0.00518478	9.09913e-17	115006	0.000575659	66.2412
rs116843064	A	G	A	G	-0.162005	0.0806	0.01986	0.0273	19	8429323	0.1001	0.4206	0.0145897	1.20005e-28	115006	0.00102177	117.628
rs117188729	A	T	A	T	-0.0674619	-0.0639	0.03129	0.01787	19	8415076	0.1226	0.6022	0.011854	1.29999e-08	115006	0.000275897	31.738
rs117733303	G	A	G	A	-0.257737	-0.058	0.018512	0.01133	6	160922870	0.1533	0.705399	0.0150735	1.50003e-65	115006	0.00241391	278.282
rs11895352	T	C	T	C	-0.0260019	0.0232	0.475391	0.5812	2	20367135	0.0331	0.4838	0.00408008	1.89998e-10	115006	0.000337231	38.7959
rs11940694	G	A	G	A	0.0252725	0.0085	0.605096	0.647	4	39414993	0.0341	0.8041	0.00418963	1.6e-09	115006	0.000305241	35.1146
rs12208357	T	C	T	C	0.052959	0.1763	0.069994	0.05697	6	160543148	0.07	0.0117501	0.00799355	3.50026e-11	115006	0.000365137	42.0076
rs12212146	C	T	C	T	0.0486004	0.0805	0.07432	0.06268	6	161125454	0.0675	0.2327	0.0079579	1e-09	115006	0.000324995	37.3878
rs12601919	G	A	G	A	0.0295034	-0.0459	0.188889	0.2383	17	65826861	0.0381	0.2292	0.0052154	1.5e-08	115006	0.000266723	30.6824
rs1260326	C	T	C	T	-0.111017	0.0672	0.604008	0.6491	2	27730940	0.0343	0.0500899	0.00415484	2.79898e-157	115006	0.00589574	682.055
rs12916	C	T	C	T	0.0228919	-0.0127	0.400366	0.4539	5	74656539	0.0326	0.6979	0.00415312	3.50002e-08	115006	0.000251615	28.9441
rs13108218	G	A	G	A	-0.0379084	0.0248	0.615408	0.6771	4	3443931	0.035	0.4781	0.00421058	2.19989e-19	115006	0.000680243	78.284
rs1394092	T	C	T	C	0.0308858	0.0207	0.726704	0.7691	3	136196071	0.0385	0.590799	0.00457557	1.50003e-11	115006	0.000378912	43.5929
rs141469619	G	A	G	A	0.245646	-0.0157	0.010139	0.004075	11	116714293	0.2702	0.9535	0.0214883	2.90001e-30	115006	0.00121121	139.463
rs142385484	T	C	T	C	-0.0354607	-0.0337	0.147429	0.1622	19	50016759	0.0447	0.4514	0.00580741	1e-09	115006	0.00031611	36.3654
rs1471251	T	A	T	A	0.0300907	-0.0623	0.397122	0.3963	4	87976359	0.0333	0.06158	0.00417393	5.60015e-13	115006	0.000433559	49.8826
rs149615216	T	C	T	C	0.165886	-0.0249	0.010798	0.00492	18	47106028	0.2284	0.9131	0.0197482	4.49987e-17	115006	0.000587865	67.6466
rs150844304	C	A	C	A	0.123444	-0.263	0.025675	0.005011	15	43726625	0.2296	0.2519	0.0128702	8.69961e-22	115006	0.000762402	87.7462
rs1540037	G	A	G	A	0.0334693	-0.0061	0.778329	0.7628	18	47182664	0.0384	0.8728	0.00501538	2.49977e-11	115006	0.000386541	44.4709
rs1561748	C	G	C	G	-0.0478427	-0.0184	0.267445	0.1448	8	19733244	0.046	0.6896	0.00495775	4.90004e-22	115006	0.000896884	103.238
rs174564	G	A	G	A	0.0640584	0.0252	0.347009	0.4146	11	61588305	0.033	0.4445	0.0042621	4.70002e-51	115006	0.00185965	214.265
rs182611493	G	A	G	A	-0.147423	0.0695	0.012519	0.0509	19	19458388	0.0766	0.3642	0.0195931	5.30029e-14	115006	0.000537352	61.8309
rs1993453	G	A	G	A	-0.02592	0.028	0.663073	0.6153	8	59347184	0.0335	0.403	0.00430541	1.7e-09	115006	0.000300191	34.5335
rs2000999	A	G	A	G	0.0298539	-0.0839	0.188603	0.1942	16	72108093	0.041	0.0408301	0.00519643	9.20005e-09	115006	0.000272781	31.3795
rs2035816	G	A	G	A	-0.0412481	-0.0563	0.084302	0.03027	4	100508556	0.0945	0.5513	0.00733618	1.89998e-08	115006	0.000262681	30.2173
rs2070971	T	G	T	G	0.0323992	-0.036	0.137117	0.1884	7	44197583	0.0418	0.3895	0.00593066	4.70002e-08	115006	0.000248394	28.5734
rs261290	C	T	C	T	-0.0732738	0.132	0.654648	0.6181	15	58678720	0.0335	7.99392e-05	0.0042887	1.9002e-65	115006	0.00242771	279.876
rs2721961	G	T	G	T	-0.0258897	-0.0378	0.280836	0.3091	8	116657911	0.0353	0.2848	0.00453049	1.09999e-08	115006	0.000270748	31.1455
rs2740488	C	A	C	A	-0.0279599	-0.0627	0.265318	0.1968	9	107661742	0.0412	0.1282	0.00461953	1.40001e-09	115006	0.000304767	35.0601
rs28752924	C	T	C	T	0.0298078	-0.0644	0.445515	0.4437	6	31303922	0.0371	0.0824404	0.00421669	1.59993e-12	115006	0.000438977	50.5063
rs2943635	T	C	T	C	0.0263224	-0.0219	0.679825	0.6575	2	227077377	0.0342	0.522001	0.00435741	1.5e-09	115006	0.000301624	34.6984
rs3198697	T	C	T	C	-0.0266243	0.0148	0.406701	0.4121	16	15129940	0.033	0.6546	0.00414239	1.29999e-10	115006	0.000342086	39.3547
rs328	G	C	G	C	-0.144553	-0.0304	0.100282	0.08872	8	19819724	0.0571	0.5949	0.00674923	9.2045e-102	115006	0.00377063	435.278
rs35166446	GT	G	GT	G	-0.0226215	0.0475	0.469097	0.4574	10	94533176	0.0331	0.1511	0.0041058	3.59998e-08	115006	0.000254889	29.3207
rs3812316	G	C	G	C	-0.113417	0.0354	0.129276	0.1276	7	73020337	0.0486	0.4661	0.00605828	3.29989e-78	115006	0.00289591	334.008
rs4564803	T	G	T	G	-0.0716528	0.0218	0.22818	0.2779	2	21205502	0.0364	0.5489	0.00483413	1.10002e-49	115006	0.00180838	208.348
rs4704834	G	A	G	A	0.0435104	-0.0264	0.644043	0.6719	5	156443066	0.0348	0.4473	0.00424371	1.10002e-24	115006	0.000868018	99.9122
rs4846914	A	G	A	G	-0.0305214	0.025	0.605403	0.5464	1	230295691	0.0328	0.4461	0.00416166	2.19989e-13	115006	0.000445079	51.2087
rs4963506	A	G	A	G	0.0283401	-0.0128	0.19572	0.2246	11	62187666	0.0391	0.7438	0.00513448	3.40001e-08	115006	0.000252857	29.0869
rs526748	T	G	T	G	0.0252409	0.0429	0.554382	0.5072	10	99772373	0.0327	0.1899	0.00408852	6.69993e-10	115006	0.000314783	36.2127
rs534417	G	A	G	A	0.0388228	0.073	0.875008	0.8861	1	23784965	0.0512	0.1543	0.00612967	2.39999e-10	115006	0.000329684	37.9275
rs602633	G	T	G	T	0.0269222	-0.0457	0.782937	0.783	1	109821511	0.0395	0.2471	0.00492268	4.49997e-08	115006	0.000246356	28.3389
rs60960031	A	G	A	G	-0.0261665	-0.041	0.40287	0.4137	2	21530659	0.0332	0.218	0.00415102	2.90001e-10	115006	0.000329424	37.8975
rs615632	T	C	T	C	0.032758	-0.0395	0.532027	0.4597	8	9796321	0.068	0.561699	0.00409114	1.20005e-15	115006	0.000534342	61.4843
rs632057	G	T	G	T	-0.0313916	-0.003	0.627772	0.5718	6	139834012	0.0327	0.9263	0.00420479	8.30042e-14	115006	0.000460541	52.9884
rs633695	G	A	G	A	0.0561391	-0.126	0.292334	0.3053	15	58725839	0.0355	0.000382296	0.00448995	7.19946e-36	115006	0.00130397	150.158
rs67981690	G	A	G	A	0.0352695	0.0179	0.129099	0.1914	12	21343886	0.0417	0.668299	0.0060985	7.29995e-09	115006	0.000279718	32.1777
rs6905288	A	G	A	G	0.0225611	-0.0011	0.568514	0.5671	6	43758873	0.0331	0.9727	0.00409377	3.59998e-08	115006	0.000249723	28.7263
rs6938550	A	G	A	G	-0.0416299	-0.009	0.914146	0.8737	6	20462138	0.0491	0.8542	0.00725594	9.59997e-09	115006	0.00027203	31.2931
rs7140110	C	T	C	T	0.0308525	-0.0001	0.299398	0.28	13	114544024	0.0364	0.9988	0.00444456	3.90032e-12	115006	0.000399329	45.9428
rs72555385	G	A	G	A	0.0608942	0.149	0.049314	0.02284	7	73123473	0.1106	0.1778	0.00944248	1.09999e-10	115006	0.000347688	39.9994
rs739320	C	T	C	T	-0.0278563	-0.0554	0.606658	0.6733	19	49261368	0.0349	0.1121	0.00425974	6.20012e-11	115006	0.000370332	42.6054
rs7679	C	T	C	T	0.0367199	0.0053	0.186416	0.1483	20	44576502	0.0454	0.9064	0.00523526	2.29985e-12	115006	0.000408996	47.0554
rs76895963	G	T	G	T	-0.0905878	-0.0257	0.020559	0.03123	12	4384844	0.0965	0.7898	0.0158259	1e-08	115006	0.000330483	38.0195
rs77697917	T	C	T	C	0.0671205	0.0526	0.02872	0.0313	17	41840849	0.0942	0.5767	0.0121727	3.50002e-08	115006	0.000251344	28.9129
rs7973253	G	A	G	A	0.0262014	-0.055	0.367262	0.3267	12	109878115	0.0349	0.1145	0.00422845	5.80003e-10	115006	0.000319065	36.7054
rs8107974	T	A	T	A	-0.11801	0.0993	0.075532	0.06462	19	19388500	0.0668	0.1372	0.00771236	7.50067e-53	115006	0.00194487	224.104
rs9271573	C	A	C	A	0.0428694	-0.0016	0.593643	0.5831	6	32590501	0.0363	0.9648	0.00413639	3.59998e-25	115006	0.000886662	102.06
rs964184	C	G	C	G	-0.205217	-0.0034	0.867233	0.8543	11	116648917	0.046	0.9413	0.00599383	1e-200	115006	0.00969801	1126.23
rs9910747	C	A	C	A	0.0465726	0.0347	0.062203	0.07814	17	17433959	0.061	0.5693	0.00842915	3.29997e-08	115006	0.000253053	29.1094

## Sheet: Table S9
SNP	effect_allele.exposure	other_allele.exposure	effect_allele.outcome	other_allele.outcome	beta.exposure	beta.outcome	eaf.exposure	eaf.outcome	chr	pos	se.outcome	pval.outcome	se.exposure	pval.exposure	samplesize.exposure	R2	F
rs1002687	A	G	A	G	0.0966459	-0.0153	0.644739	0.7144	1	62963737	0.036	0.670601	0.00418603	6.19441e-118	115006	0.00427886	494.201
rs10096633	T	C	T	C	-0.0353479	-0.0295	0.123902	0.09716	8	19830921	0.0548	0.590101	0.00607439	5.89997e-09	115006	0.000271262	31.2046
rs102275	C	T	C	T	-0.0974467	0.0273	0.349751	0.4159	11	61557803	0.033	0.4072	0.00419031	1.30017e-119	115006	0.0043192	498.88
rs112875651	A	G	A	G	-0.0771818	-0.0013	0.392337	0.3873	8	126506694	0.0334	0.9699	0.00416206	9.09913e-77	115006	0.00284042	327.59
rs115478735	T	A	T	A	0.0377218	0.0593	0.183303	0.1977	9	136149711	0.0408	0.1465	0.0051847	3.40017e-13	115006	0.000426035	49.0166
rs117488242	G	A	G	A	-0.0395506	-0.0495	0.131672	0.1409	10	5261832	0.0469	0.2918	0.0062118	1.89998e-10	115006	0.000357695	41.1511
rs11789603	T	C	T	C	0.0485333	0.0191	0.108847	0.07545	9	107647019	0.0617	0.756401	0.00645014	5.30029e-14	115006	0.00045696	52.5763
rs1260326	C	T	C	T	-0.0769268	0.0672	0.604008	0.6491	2	27730940	0.0343	0.0500899	0.00409565	1e-78	115006	0.00283083	326.481
rs12899324	T	C	T	C	-0.0249388	0.0029	0.267169	0.2091	15	58555709	0.04	0.9416	0.00453908	3.89996e-08	115006	0.00024354	28.0149
rs13108218	G	A	G	A	-0.03457	0.0248	0.615408	0.6771	4	3443931	0.035	0.4781	0.00415007	8.10028e-17	115006	0.000565708	65.0955
rs141469619	G	A	G	A	0.129333	-0.0157	0.010139	0.004075	11	116714293	0.2702	0.9535	0.0211726	1e-09	115006	0.000335752	38.6257
rs142158911	A	G	A	G	-0.0918337	-0.1007	0.116703	0.1025	19	11190534	0.0542	0.0631495	0.00627871	1.9002e-48	115006	0.00173869	200.305
rs1800961	T	C	T	C	-0.0725012	-0.0152	0.030194	0.04551	20	43042364	0.0782	0.846	0.0117086	5.89997e-10	115006	0.000307841	35.4138
rs1883711	C	G	C	G	0.092425	0.0493	0.031197	0.06322	20	39179822	0.0673	0.4641	0.0117789	4.30031e-15	115006	0.000516366	59.4148
rs2126259	C	T	C	T	0.0848201	0.0315	0.899179	0.844	8	9185146	0.0479	0.5108	0.00666008	3.69999e-37	115006	0.00130444	150.212
rs2326077	T	C	T	C	-0.0289922	0.0218	0.663245	0.6147	8	59385919	0.0334	0.5141	0.00424779	8.80035e-12	115006	0.000375474	43.1973
rs2378390	A	G	A	G	-0.0322928	-0.0113	0.140867	0.09094	20	34154937	0.0562	0.84	0.00578408	2.39999e-08	115006	0.000252413	29.0358
rs2737245	T	G	T	G	-0.0289264	-0.0361	0.278612	0.3085	8	116658583	0.0353	0.3062	0.00447959	1.09999e-10	115006	0.000336347	38.6943
rs2740488	C	A	C	A	-0.0487388	-0.0627	0.265318	0.1968	9	107661742	0.0412	0.1282	0.00455112	9.20026e-27	115006	0.000926074	106.601
rs34955778	C	T	C	T	-0.0298264	-0.0302	0.419962	0.4401	16	15139594	0.0328	0.3575	0.00406597	2.19989e-13	115006	0.000433409	49.8654
rs3770586	T	C	T	C	-0.0239799	0.0039	0.48398	0.4147	2	169828995	0.033	0.9055	0.0040256	2.59998e-09	115006	0.000287223	33.0412
rs3822855	T	G	T	G	0.024354	0.0903	0.400782	0.4261	6	116316882	0.0329	0.00603198	0.00408866	2.59998e-09	115006	0.000284881	32.7718
rs3843482	G	T	G	T	0.0417429	-0.0138	0.373831	0.44	5	74639259	0.0327	0.673101	0.00414282	7.10068e-24	115006	0.000815759	93.8922
rs4008004	A	C	A	C	0.032262	0.093	0.221833	0.2711	9	15306292	0.0367	0.01136	0.00484549	2.80027e-11	115006	0.000359345	41.341
rs4299376	T	G	T	G	-0.0316651	0.0433	0.676282	0.7831	2	44072576	0.0396	0.2744	0.00429201	1.59993e-13	115006	0.000439022	50.5115
rs4860948	A	T	A	T	0.0339763	-0.0335	0.244351	0.2378	4	69340991	0.0382	0.3803	0.00467825	3.80014e-13	115006	0.000426301	49.0472
rs534417	G	A	G	A	0.0388809	0.073	0.875008	0.8861	1	23784965	0.0512	0.1543	0.00603954	1.2e-10	115006	0.000330672	38.0411
rs553427	T	C	T	C	0.0294629	-0.0609	0.517036	0.5599	1	234852760	0.0329	0.06418	0.00400838	1.99986e-13	115006	0.000433527	49.879
rs55747707	A	G	A	G	-0.0613446	-0.0095	0.203638	0.1799	7	73037366	0.0422	0.8213	0.00499234	1.10002e-34	115006	0.00122054	140.539
rs56322906	A	G	A	G	-0.104409	0.0226	0.035155	0.06338	19	11346155	0.0673	0.736999	0.0108919	9.20026e-22	115006	0.000739521	85.1108
rs56325564	A	G	A	G	0.0244343	0.0003	0.482656	0.4589	17	45766771	0.0327	0.9923	0.00403952	1.5e-09	115006	0.000298158	34.2996
rs5754102	A	C	A	C	-0.0299164	-0.0627	0.183238	0.3181	22	21927231	0.0352	0.0749998	0.00524251	1.2e-08	115006	0.000267892	30.8169
rs58542926	T	C	T	C	-0.152986	0.0976	0.074379	0.06416	19	19379549	0.0671	0.1458	0.00764087	3.50026e-89	115006	0.00322268	371.819
rs59774409	T	C	T	C	0.0449922	-0.1002	0.083061	0.04492	19	50016748	0.0791	0.205	0.0072382	5.1e-10	115006	0.000308349	35.4723
rs6547409	T	C	T	C	-0.0840141	-0.0547	0.051259	0.07698	2	21190209	0.061	0.3702	0.00918864	6.09958e-20	115006	0.000686518	79.0066
rs660240	C	T	C	T	0.0590181	-0.05	0.784707	0.7865	1	109817838	0.0397	0.2078	0.00487757	1.10002e-33	115006	0.0011769	135.507
rs6602911	T	C	T	C	0.0282535	0.0183	0.360074	0.3623	13	114547372	0.0342	0.5921	0.00417476	1.29987e-11	115006	0.000367871	42.3223
rs672889	G	T	G	T	0.0741478	-0.0423	0.860074	0.8536	2	21319016	0.0461	0.3591	0.00576774	8.00018e-38	115006	0.00132331	152.387
rs6882345	A	G	A	G	0.0447124	-0.032	0.63285	0.6671	5	156397673	0.0347	0.356	0.0041533	5.00035e-27	115006	0.000929031	106.942
rs6938647	C	A	C	A	-0.0467505	-0.0245	0.782332	0.8098	6	160986915	0.0418	0.5581	0.00491708	1.9002e-21	115006	0.000744369	85.6692
rs72848251	A	G	A	G	0.0446617	-0.0595	0.194636	0.2418	6	32602483	0.0516	0.2487	0.00519436	8.10028e-18	115006	0.00062534	71.9615
rs72997616	A	C	A	C	-0.0661452	0.1294	0.094062	0.1052	11	75474195	0.0529	0.0144501	0.00689755	8.80035e-22	115006	0.000745657	85.8176
rs76116020	G	A	G	A	-0.0591283	0.1164	0.043763	0.04514	16	69385641	0.0781	0.1361	0.00981616	1.7e-09	115006	0.000292613	33.6615
rs7707394	A	G	A	G	0.0264956	0.0433	0.357102	0.3731	5	74472939	0.0335	0.196	0.0041765	2.19999e-10	115006	0.000322338	37.0821
rs77960347	G	A	G	A	0.273167	-0.2578	0.013234	0.007278	18	47109955	0.1832	0.1593	0.0175111	7.29962e-55	115006	0.00194891	224.57
rs7970695	A	G	A	G	-0.031489	-0.0374	0.620564	0.584	12	121423376	0.0332	0.2601	0.00413849	2.80027e-14	115006	0.000466953	53.7265
rs79834165	C	T	C	T	-0.067192	-0.0566	0.03399	0.06084	6	34889423	0.0697	0.4174	0.0110702	1.29999e-09	115006	0.000296482	34.1067
rs870526	T	C	T	C	-0.0326952	0.0208	0.521425	0.6099	2	20369562	0.0334	0.533	0.00401369	3.80014e-16	115006	0.000533507	61.3882
rs9295128	T	G	T	G	-0.203827	-0.0635	0.016832	0.0115	6	160751531	0.1534	0.6791	0.0158533	7.8001e-38	115006	0.00137504	158.353
rs9304381	T	C	T	C	0.0733601	-0.0192	0.818428	0.8233	18	47158234	0.0428	0.6541	0.00520395	4.00037e-45	115006	0.00159948	184.241
rs9616847	T	A	T	A	0.0227377	0.0428	0.388308	0.416	22	50868669	0.033	0.195	0.00413329	3.79997e-08	115006	0.000245602	28.2522
rs964184	C	G	C	G	-0.150407	-0.0034	0.867233	0.8543	11	116648917	0.046	0.9413	0.00590579	4.4978e-143	115006	0.00520945	602.245

[truncated: 9 more sheets: Table S10, Table S11, Table S12, Table S13, Table S14, Table S15, Table S16, Table S17, Table S18]
